# Supplementary material for: MAST1 modulates neuronal differentiation and cell cycle exit via P27 in neuroblastoma cells
Source: PubMed Central journal article supplement (PMC7262902; doi:10.1002/2211-5463.12860), 2020-04-29
Supplement: FEB4-10-1104-s001.pdf [file FEB4-10-1104-s001.pdf]

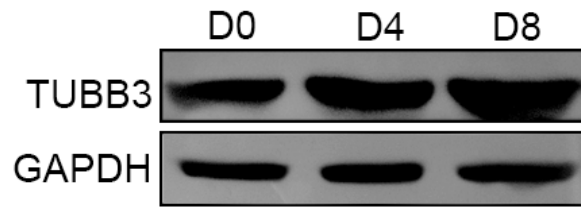

1

2 **Supplementary Figure 1.** Western blot analysis of protein expression of the neuronal marker

3 TUBB3, from different phases of SH-SY5Y cell neuronal differentiation. D, day.

4

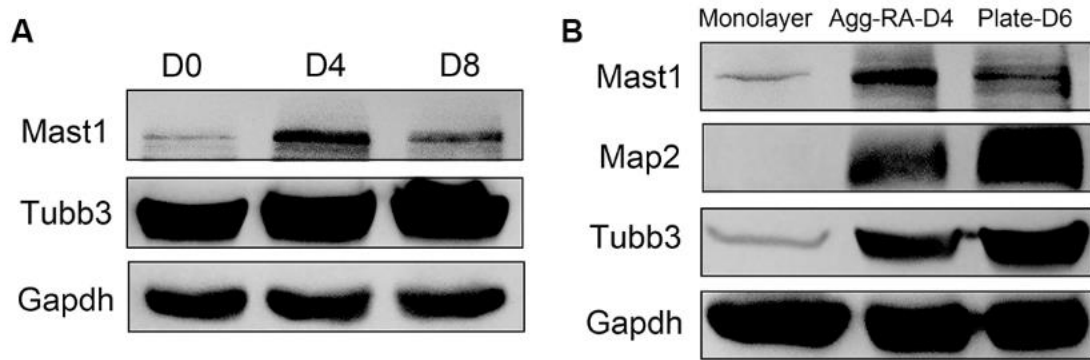

5

6

**Supplementary Figure 2.** Induced expression of MAST1 during N<sub>2</sub>a and P19 cell neuronal

7

differentiation. (A) Western blot analysis of protein expressions of MAST1 and the neuronal

8

markers Tubb3, from different phases of N<sub>2</sub>a cell neuronal differentiation. N<sub>2</sub>a cells which

9

had cultured in the presence of 10  $\mu$ M RA for 8 days. (B) Western blot analysis of protein

10

expressions of MAST1 and the neuronal markers Tubb3 and Map2, from different phases of

11

P19 cell neuronal differentiation. P19 cell aggregated in the presence of 1  $\mu$ M RA for 4 days

12

followed by plating on culture dishes for 6 days. Agg, aggregation; D, day.

13

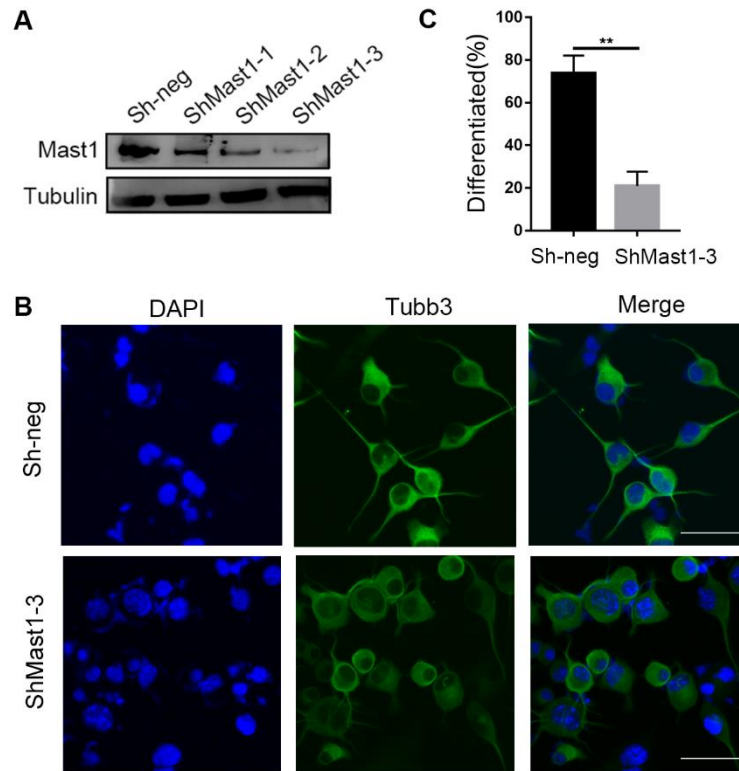

14

15 **Supplementary Figure 3.** RNA interference targeting Mast1 impairs the neuronal  
 16 differentiation of N<sub>2</sub>a cells. (A) Western blot analysis of Mast1 protein expressions in control  
 17 (sh-neg), and shMast1-1, shMast1-2 and shMast1-3 lentiviruses infected N<sub>2</sub>a cells, which  
 18 were cultured in the presence of RA for 4 days. (B) Immunostaining of neuronally  
 19 differentiated N<sub>2</sub>a cells, which were cultured in the presence of RA for 8 days, with anti-  
 20 Tubb3 antibody. (C) The percentage of differentiated N<sub>2</sub>a cells was determined. Scale bars,  
 21 200  $\mu$ m. Data are depicted as means  $\pm$  SD of at least three independent experiments.

22 \*\*P<0.01, as determined by the two-tailed unpaired Student's *t* test.

23
